# Supplementary material for: Electrospinning of highly aligned fibers for drug delivery applications
Source: Royal Society of Chemistry journal article supplement (doi:10.1039/c8tb01258j), 2018-12-04
Supplement: c8tb01258j1.pdf [file c8tb01258j1.pdf]

## Supplementary Information

### Electrospinning of Highly Aligned Fibers for Drug Delivery Applications

*Mohammad Javad Eslamian, Milad Khorrami, Ning Yi, Sheereen Majd, Mohammad Reza Abidian\**

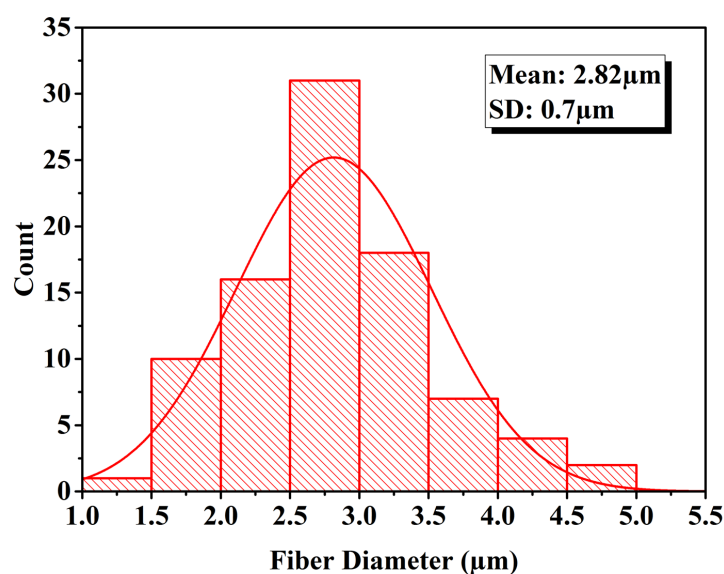

Figure S1. Histogram size distribution of PLGA fibers with electrospinning setup of  $V = 12\text{kV}$ ,  $Q = 400\text{ }\mu\text{l.hr}^{-1}$ ,  $w = 1000\text{ rpm}$ ,  $d = 0.41\text{ mm}$ , and  $l = 14\text{ cm}$ . (diameter  $2.82 \pm 0.7\text{ }\mu\text{m}$ ,  $n=100$ )
